# Supplementary material for: Genomic newborn screening: feasibility, acceptability and clinical outcomes
Source: Research Square preprint supplement (doi:10.21203/rs.3.rs-6616246/v1), 2025-05-27
Supplement: Supplementary file 1 [file f2830d2ada815d965efcd17a.docx]

**GENOMIC NEWBORN SCREENING: FEASIBILITY, ACCEPTABILITY AND CLINICAL OUTCOMES**

**Supplementary Appendix**

TABLE OF CONTENTS

[1. FIGURES AND TABLES 2](#_Toc197440185)

[**Table S1. Custom Illumina Emedgene variant filter configurations used for automated flagging of variants of interest** 2](#_Toc197440186)

[**Table S2a. Known pathogenic variant filter configuration** 2](#_Toc197440187)

[**Table S1b. High impact variant filter configuration** 3](#_Toc197440188)

[**Table S1c. Moderate impact variant filter configuration** 4](#_Toc197440189)

[**Table S1d. Low impact variant filter configuration** 5](#_Toc197440190)

[**Table S1e. Other variant filter configurations** 6](#_Toc197440191)

[**Table S2. Participant enrolment in BabyScreen+ by recruitment method** 7](#_Toc197440192)

[**Table S3. Reasons for sample reprocessing** 8](#_Toc197440193)

[**Table S4. Methods of sample reprocessing** 8](#_Toc197440194)

[**Figure S1. Number of low coverage samples requiring additional sequencing data generation (top-up)** 9](#_Toc197440195)

[**Table S5. Results of genomic data analysis pipeline validation** 10](#_Toc197440196)

[**Table S6. Inclusion and exclusion of variants at consecutive genomic data analysis steps** 11](#_Toc197440197)

[**Table S7. Variants excluded after full curation** 12](#_Toc197440198)

[**Table S8. Modelling impact of revised variant filter configurations on rate of automated low chance results** 13](#_Toc197440199)

[**Table S9. Variants reported in high chance BabyScreen+ cases** 13](#_Toc197440200)

[**Table S10. Participant decision making difficulty and time taken (n=987)** 14](#_Toc197440201)

[**Table S11. Reasons for declining genomic newborn screening (n=10)** 15](#_Toc197440202)

[**Table S12. Participant attitudes relating to genomic newborn screening (n=372)** 16](#_Toc197440203)

[**Table S13. Comparison of high chance results between genomic newborn screening studies** 16](#_Toc197440204)

[2. REFERENCES 17](#_Toc197440205)

# **FIGURES AND TABLES**

## **Table S1. Custom Illumina Emedgene variant filter configurations used for automated flagging of variants of interest**

### **Table S2a. Known pathogenic variant filter configuration**

| **Preset number** | **1** | **2** | **3** |
| --- | --- | --- | --- |
| **Preset name** | **Known pathogenic: Heterozygous** | **Known pathogenic: Homozygous** | **Known pathogenic: Compound heterozygous candidatesa** |
| **Minimum read depth** | 5 | 5 | 5 |
| **Allele bias** | 0.15-1 | 0.15-1 | 0.15-1 |
| **CNV length (nucleotides)** | >50 | >50 | >50 |
| **Maximum gnomAD allele frequency** | 0.02 | 0.02 | 0.02 |
| **Maximum VCGS internal allele frequency** | 0.02 | 0.02 | 0.02 |
| **gnomAD maximum homozygote/ hemizygote count** | N/A | N/A | N/A |
| **CNV NoiseDBb frequency** | 0.05 | 0.05 | 0.05 |
| **Variant effects** | Known pathogenic (ClinVar, VCGS, Shariant) | Known pathogenic (ClinVar, VCGS, Shariant) | Known pathogenic (ClinVar, VCGS, Shariant) |
| **Zygosity** | Heterozygous | Homozygous | Heterozygous |
| **Mode of inheritance** | Monoallelic | Biallelic | Biallelic |
| **Region** | N/A | N/A | N/A |
| **Genomenon**  **Mastermind** | N/A | N/A | N/A |
| **Exclusion** | Known benign (ClinVar 2+ star, VCGS) | Known benign (ClinVar 2+ star, VCGS) | Known benign (ClinVar 2+ star, VCGS) |

The known pathogenic variant filter configuration flagged variants that had previously been described as pathogenic or likely pathogenic in ClinVar, Shariant1 and/or internal VCGS databases.

### **Table S1b. High impact variant filter configuration**

| **Preset number** | **4** | **5** | **6** |
| --- | --- | --- | --- |
| **Preset name** | **High impact: Heterozygous** | **High impact: Homozygous** | **High impact: Compound heterozygous candidatesa** |
| **Minimum read depth** | 5 | 5 | 5 |
| **Allele bias** | 0.15-1 | 0.15-1 | 0.15-1 |
| **CNV length (nucleotides)** | >50 | >50 | >50 |
| **Maximum gnomAD allele frequency** | 0.0001 | 0.001 | 0.001 |
| **Maximum VCGS internal allele frequency** | 0.02 | 0.02 | 0.02 |
| **gnomAD maximum homozygote/ hemizygote count** | N/A | 1 | 1 |
| **CNV NoiseDBb frequency** | 0.05 | 0.05 | 0.05 |
| **Variant effects** | High  (as defined below) | High  (as defined below) | High  (as defined below) |
| **Zygosity** | Heterozygous | Homozygous | Heterozygous |
| **Mode of inheritance** | Monoallelic | Biallelic | Biallelic |
| **Region** | N/A | N/A | N/A |
| **Genomenon**  **Mastermind** | N/A | N/A | N/A |
| **Exclusion** | Known benign (ClinVar 2+ star, VCGS) | Known benign (ClinVar 2+ star, VCGS) | Known benign (ClinVar 2+ star, VCGS) |

The high impact variant filter configuration flagged variants where the predicted effect was one of: splice acceptor variant, splice donor variant, stop gained, frameshift, stop lost, start lost, transcript ablation, or transcript amplification, as annotated by Emedgene (Illumina).

### **Table S1c. Moderate impact variant filter configuration**

| **Preset number** | **7** | **8** | **9** |
| --- | --- | --- | --- |
| **Preset name** | **Moderate impact: Heterozygous** | **Moderate impact: Homozygous** | **Moderate impact: Compound heterozygous candidatesa** |
| **Minimum read depth** | 5 | 5 | 5 |
| **Allele bias** | 0.15-1 | 0.15-1 | 0.15-1 |
| **CNV length (nucleotides)** | >50 | >50 | >50 |
| **Maximum gnomAD allele frequency** | 0.0001 | 0.001 | 0.001 |
| **Maximum VCGS internal allele frequency** | 0.02 | 0.02 | 0.02 |
| **gnomAD maximum homozygote/ hemizygote count** | N/A | 1 | 1 |
| **CNV NoiseDBb frequency** | 0.05 | 0.05 | 0.05 |
| **Variant effects** | Moderate  (as defined below) | Moderate  (as defined below) | Moderate  (as defined below) |
| **Zygosity** | Heterozygous | Homozygous | Heterozygous |
| **Mode of inheritance** | Monoallelic | Biallelic | Biallelic |
| **Region** | N/A | N/A | N/A |
| **Genomenon**  **Mastermind** | Non-specific match | Non-specific match | Non-specific match |
| **Exclusion** | Known benign (ClinVar 2+ star, VCGS) | Known benign (ClinVar 2+ star, VCGS) | Known benign (ClinVar 2+ star, VCGS) |

The moderate impact variant filter configuration flagged variants where the predicted effect was one of: in-frame insertion, in-frame deletion, or missense, as annotated by Emedgene (Illumina).

### **Table S1d. Low impact variant filter configuration**

| **Preset number** | **10** | **11** | **12** |
| --- | --- | --- | --- |
| **Preset name** | **Low impact: Heterozygous** | **Low impact: Homozygous** | **Low impact: Compound heterozygous candidatesa** |
| **Minimum read depth** | 5 | 5 | 5 |
| **Allele bias** | 0.15-1 | 0.15-1 | 0.15-1 |
| **CNV length (nucleotides)** | >50 | >50 | >50 |
| **Maximum gnomAD allele frequency** | 0.0001 | 0.001 | 0.001 |
| **Maximum VCGS internal allele frequency** | 0.02 | 0.02 | 0.02 |
| **gnomAD maximum homozygote/ hemizygote count** | N/A | 1 | 1 |
| **CNV NoiseDBb frequency** | 0.05 | 0.05 | 0.05 |
| **Variant effects** | Low  (as defined below) | Low  (as defined below) | Low  (as defined below) |
| **Zygosity** | Heterozygous | Homozygous | Heterozygous |
| **Mode of inheritance** | Monoallelic | Biallelic | Biallelic |
| **Region** | N/A | N/A | N/A |
| **Genomenon**  **Mastermind** | Specific match | Specific match | Specific match |
| **Exclusion** | Known benign (ClinVar 2+ star, VCGS) | Known benign (ClinVar 2+ star, VCGS) | Known benign (ClinVar 2+ star, VCGS) |

The low impact variant filter configuration flagged variants located in a likely splice-regulatory region, i.e. the first/last 8 nucleotides of an intron or first/last 3 nucleotides of an exon, as annotated by Emedgene (Illumina).

### **Table S1e. Other variant filter configurations**

| **Preset number** | **13** | **14** |
| --- | --- | --- |
| **Preset name** | ***IGHM*c** | **mtDNA_m.1555, m.1494** |
| **Minimum read depth** | 5 | 5 |
| **Allele bias** | 0.15-1 | 0.15-1 |
| **CNV length (nucleotides)** | >50 | >50 |
| **Maximum gnomAD allele frequency** | 0.001 | N/A |
| **Maximum VCGS internal allele frequency** | 0.02 | 0.02 |
| **gnomAD maximum homozygote/ hemizygote count** | N/A | N/A |
| **CNV NoiseDBb frequency** | 0.05 | 0.05 |
| **Variant effects** | N/A | N/A |
| **Zygosity** | N/A | N/A |
| **Mode of inheritance** | N/A | N/A |
| **Region** | chr14:105851705-105856218 | chrM:1555, chrM:1494 |
| **Genomenon**  **Mastermind** | N/A | N/A |
| **Exclusion** | Known benign (ClinVar 2+ star, VCGS) | Known benign (ClinVar 2+ star, VCGS) |

Other variant filter configurations were used for two specific cases:

- Variants in the IGHM gene, which is not annotated by the analysis pipeline due to lack of an NM RefSeq transcript ID.
- Two specific variants in the mitochondrial DNA genome that are known to be associated with an increased risk of mitochondrial non-syndromic sensorineural hearing loss: NC_012920.1: m.1555A>G, and NC_012920.1: m.1494C>T.

*Table notes*

CNV: Copy number variant, mtDNA: Mitochondrial DNA, VCGS: Victorian Clinical Genetics Services

a Variants of interest identified by the Known Pathogenic: Compound Heterozygous Candidates, High Impact: Compound Heterozygous Candidates, Moderate Impact: Compound Heterozygous Candidates, and Low Impact: Compound Heterozygous Candidates presets underwent additional post-processing to determine whether >1 variant was present across all presets. A case was not flagged as a potential high chance result by the automation if <2 variants of interest in the same gene were identified by the Compound Heterozygous Candidates presets.

b CNV NoiseDB is a database of CNV frequencies in the first ~500 BabyScreen+ samples sequenced during the study, compiled by the Emedgene (Illumina) team.

c Variants of interest identified by the *IGHM* preset underwent additional post-processing to determine whether >1 variant and/or a homozygous variant was present. A case was not flagged as a potential high chance result by the automation if only a single heterozygous variant of interest was identified by the *IGHM* preset.

## **Table S2. Participant enrolment in BabyScreen+ by recruitment method**

| **Recruitment method** | **Number of completed enrolments** | **% completed enrolments** | **Number of incomplete enrolments** | **% incomplete enrolments** | **Total initiated enrolments** |
| --- | --- | --- | --- | --- | --- |
| Active recruitmenta | 667 | 82% | 145 | 18% | 812 |
| Social mediab | 190 | 70% | 82 | 30% | 272 |
| Passive methodsc | 115 | 65% | 63 | 35% | 178 |
| Study teamd | 26 | 100% | 0 | 0% | 26 |
| **Total** | 998 | 77% | 290 | 23% | 1288 |

*Table notes*

a Healthcare professionals raised the study with eligible pregnant women and provided them with a study invitation card. Active recruitment was undertaken in both private and public healthcare settings by midwives, obstetricians and primary care physicians.

b Paid social media advertising campaign on Facebook and Instagram targeted to women between the ages of 18 and 45 located in Victoria, Australia.

c Passive recruitment methods were used in the public healthcare setting only and included study posters and videos in antenatal clinic waiting rooms, study invitation cards enclosed in hospital antenatal packs provided by mail, direct text messages to pregnant women, and advertisement on a designated pregnancy app used at one participating hospital.

d Potential participants that approached the study team directly and unsolicited were provided with a study invitation card if eligible.

## **Table S3. Reasons for sample reprocessing**

| **Category** | **Reason for sample reprocessing** | **Number** | **% of total samples processed** |
| --- | --- | --- | --- |
| Sample related failure | Insufficient sample on DBS card | 2 | 0.2% |
| Insufficient DNA yield | 22 | 2.2% |
| Library preparation failure | 8 | 0.8% |
| Process related failure | DNA extraction batch failure | 50 | 5.0% |
| **Total** | | **82** | **8.2%** |

*Table notes*

DBS: Dried blood spot

Reasons for sample reprocessing were grouped into two categories: inherently sample related failures (light grey) that affected a single sample only and usually required collection of a new sample, and process related failures (i.e., laboratory error) that affected multiple samples at the same time and did not usually require collection of a new sample (dark grey). Sample related failures may be reduced in the future by accessing more punches from the DBS card for DNA extraction, but may not be able to be fully eliminated. Process related failures can be addressed with process improvement, including increased automation and staff training, and are considered largely preventable.

## **Table S4. Methods of sample reprocessing**

| **Sample reprocessing method** | **Number** | **% of total samples processed** |
| --- | --- | --- |
| Re-punching of original DBS card | 50 | 5.0% |
| Collection of new DBS card | 7 | 0.7% |
| Collection of fresh blood sample | 22 | 2.2% |
| **Total** | **79** | **7.9%** |

*Table notes*

DBS: Dried blood spot

Three participants declined sample recollection, resulting in a difference between the number of samples that required reprocessing (82, Table S3) and the number of samples ultimately reprocessed (79).

##
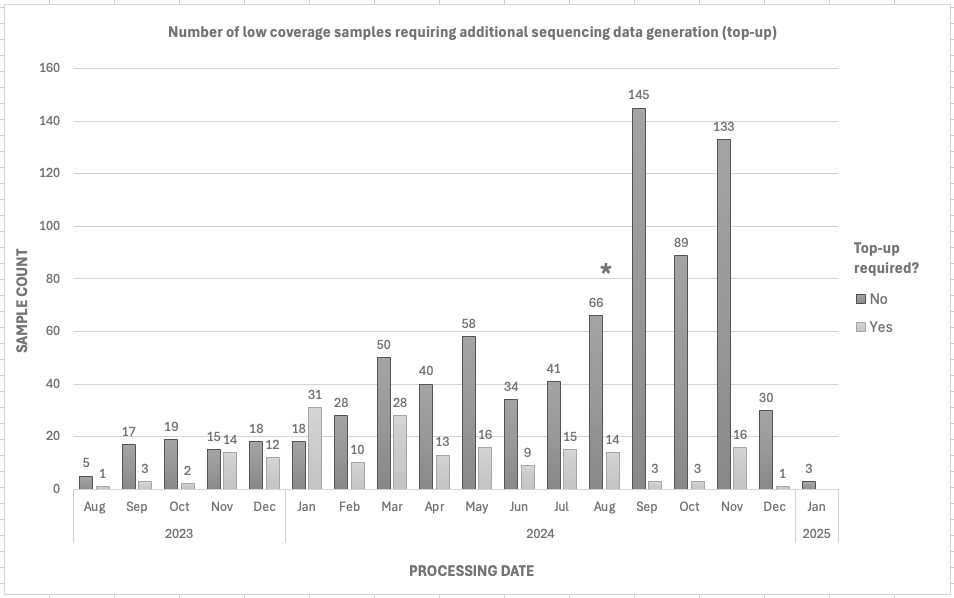
**Figure S1. Number of low coverage samples requiring additional sequencing data generation (top-up)**

Samples that failed to reach a target coverage of 30x on first pass PCR-free whole genome sequencing were sequenced again until target coverage requirements were met. Failure to meet target coverage was largely caused by high duplicate read rates and difficulty balancing sample abundance in sequencing library pools. Following optimization of sample loading conditions and introduction of quantitative real-time PCR-based library quantitation (*), failure rates dropped from an average of 29% of samples processed per month to less than 5%. Clinically valid data was ultimately generated for all sequenced samples.

## **Table S5. Results of genomic data analysis pipeline validation**

|  | **Known low chance cases** | **Known high chance cases** | **Total number** | **Total %** |
| --- | --- | --- | --- | --- |
| **Total cases** | 61 | 47 | 108 | 100% |
| Correctly flagged by automationa | 29 | 46 | 75 | 69% |
| Incorrectly flagged by automation | 0 | 1c | 1 | <1% |
| Required additional manual review b | 32 | 23 | 55 | 51% |
| No additional manual review required | 29 | 24 | 53 | 49% |

*Table notes*

a Known low chance cases were considered correctly flagged by automation when they were designated low chance without requiring additional manual review of any variants, and considered incorrectly flagged if they were designated low chance but had variants that required manual review. Known high chance cases were considered correctly flagged by automation when they had the relevant reportable variant(s) correctly flagged for manual review and were considered incorrectly flagged if the relevant reportable variant(s) were not flagged for review.

b Additional manual review is defined as any case that had at least one variant flagged in a known low chance case, and any case that had at least one non-reportable variant flagged in a known high chance case.

c The missed variant was a multi-nucleotide variant incorrectly annotated by the analysis pipeline, which is a known limitation.

## **Table S6. Inclusion and exclusion of variants at consecutive genomic data analysis steps**

| **Analysis step / outcome** | **Variant count** | **CNV (%)** | **Key reasons for exclusion of variants** |
| --- | --- | --- | --- |
| Flagged for manual review | 1045 | 557 (53%) | N/A |
| Excluded in initial review | 1009 | 557 (55%) | Low/moderate impact variants with:   - Insufficient evidence for at least likely pathogenic classification - Conflicting ClinVar entries - Insufficient literature support |
| Full variant curation | 36 | 0 | N/A |
| Excluded after full curation | 18 | 0 | High impact variants that were:   - In genes that had both dominant and recessive modes of inheritance - In genes not associated with a loss-of-function mechanism of pathogenicity, or - Mis-annotation of complex variant - Presence of variants *in cis* in recessive gene - Presence of downstream reversion variant *in cis* - Known pathogenic variants that were associated with late-onset, reduced penetrance, or mild disease |
| Reported in high chance case | 18 | 0 | N/A |

CNV: Copy number variant

## **Table S7. Variants excluded after full curation**

| **Gene** | **Mode of inheritance** | **Variant(s)** | **VCGS assessment** | **Reason for exclusion** |
| --- | --- | --- | --- | --- |
| *ABCC6* | AR | NM_001171.6:c.3421C>T (p.Arg1141*)  NM_001171.6:c.1171A>G (p.Arg391Gly) | Pathogenic  VUS | Variant combination associated with mild, adult-onset disease. |
| *BCHE* | AR | NM_000055.4:c.1253G>T (p.Gly418Val)  NM_000055.4:c.1462G>A (p.Glu488Lys) | Likely pathogenic  VUS | Insufficient evidence for pathogenicity. |
| *COL4A4* | AD and AR | NM_000092.5:c.2908C>T (p.Gln970*)  NM_000092.5:c.2756A>G (p.Glu919Gly) | Pathogenic  VUS | Multiple modes of inheritance, only screening for AR disease, Alport syndrome 2. |
| *CUL3* | AD | NM_003590.5:c.378+2T>G | VUS | Canonical splice site predicted to result in in-frame outcome. Variant located in region not associated with the screened condition, PHA2E. |
| *CYP21A2* | AR | NM_000500.9:c.293-13C>G  NM_000500.9:c.92C>T (p.Pro31Leu) | Pathogenic (severe)  Pathogenic (mild) | Variant combination associated with mild, non-classic disease. |
| *ELANE* | AD | NM_001972.4:c.193delG (p.Val65Serfs*11) | VUS | Incorrect mechanism of pathogenicity; gain-of-function variants cause disease. |
| *G6PD* | XLR | NM_001360016.2:c.477G>C (p.Met159Ile) | VUS | Insufficient evidence for severe, early-onset disease. |
| *GHR* | AD and AR | chr5:42,691,198_42,695,294del | Pathogenic (carrier) | Multiple modes of inheritance, dominant-negative mechanism of pathogenicity in AD disease. |
| *IGSF1* | XLR | NM_001555.4:c.461_486del (p.Gly154Alafs*3)  NM_001555.4:c.404_407del (p.Trp135Phefs*54) | VUS (in-frame indel) | Alignment artefact; variant is a single in-frame insertion-deletion. |
| *MT-RNR1* | Mitochondrial | NC_012920.1:m.1555A>G | Pathogenic | 2% heteroplasmy, below threshold of clinical relevance. |
| *MYO7A* | AR | NM_000260.4:c.5177C>T (p.Pro1726Leu)  NM_000260.4:c.5824G>A (p.Gly1942Arg) | VUS  VUS | Insufficient evidence for pathogenicity. |
| *REST* | AD | NM_005612.5:c.1493_1494del (p.Glu498Glyfs*17) | Not classified | Variant associated with mild condition, gingival fibromatosis. Not located in region associated with the screened condition, Wilms tumor. |

AD: Autosomal dominant, AR: Autosomal recessive, VCGS: Victorian Clinical Genetics Services, VUS: Variant of uncertain significance, XLR: X-linked recessive

## **Table S8. Modelling impact of revised variant filter configurations on rate of automated low chance results**

| **Modification to variant filters** | **Automated low chance results (% of total results)** | **Additional automated low chance results** | **High chance results missed** |
| --- | --- | --- | --- |
| Variant filter conditions used in study (baseline) | 451 (45%) | N/A | N/A |
| Removal of all CNVs | 656 (65%) | 205 | 0 |
| Removal of all CNVs and variants described in the literature onlya | 706 (71%) | 255 | 1 (*GNAS*) |
| Previously known pathogenic variants onlyb | 823 (82%) | 372 | 1 (*GNAS*) |

*Table notes*

CNV: Copy number variant

a Variants in the literature were identified using the Mastermind software suite API (Genomenon).

b Variants previously described as likely pathogenic or pathogenic in ClinVar or the internal VCGS variant database.

## **Table S9. Variants reported in high chance BabyScreen+ cases**

| **Gene** | **Variant** | **ClinVar accession number** |
| --- | --- | --- |
| *DICER1* | NM_177438.3:c.745C>T (p.Gln249*) | SUB15105434 |
| *ENG* | NM_001114753.3:c.1310G>A (p.Arg437Gln) | SUB15105434 |
| *FBN1* | NM_000138.5:c.5518C>T (p.Arg1840Cys) | SCV005399527.1 |
| *G6PD* | NM_000402.4:c.1039G>A (p.Glu347Lys) | SCV003921943.3 |
| *G6PD* | NM_001360016.2:c.1376G>T (p.Arg459Leu) | SCV005086718.1 |
| *G6PD* | NM_000402.4:c.1093G>A (p.Ala365Thr) | SUB15105434 |
| *G6PD* | NM_001360016.2:c.542A>T (p.Asp181Val) | SUB15105434 |
| *GJB2* | NM_004004.6:c.35del (p.Gly12Valfs*2) | SCV001244783.2 |
| *GJB2* | NM_004004.6:c.583A>G (p.Met195Val) | SCV005400334.1 |
| *GNAS* | NM_000516.7:c.476T>C (p.Val159Ala) | SCV005398282.1 |
| *MT-RNR1* | NC_012920.1:m.1494C>T | N/A |
| *MT-RNR1* | NC_012920.1:m.1555A>G | N/A |
| *PHKB* | NM_000293.3:c.1127-2A>G | SUB15105434 |
| *RYR1* | NM_000540.3:c.1202G>T (p.Arg401Leu) | SUB15105434 |
| *UNC13D* | NM_199242.2:c.817C>T (p.Arg273*) | SCV005400615.1 |
| *UNC13D* | NM_199242.3:c.627del (p.Val210Trpfs*39) | SCV005400606.1 |

| **Question** | **Answer** | **Number (%)** |
| --- | --- | --- |
| How difficult was it to make the decision to have genomic newborn screening? | Very difficult | 6 (1%) |
| Difficult | 72 (7%) |
| Neutral | 181 (18%) |
| Easy | 431 (44%) |
| Very Easy | 297 (30%) |
| How long did it take to make the decision to have genomic newborn screening? | Right away | 787 (80%) |
| A while | 200 (20%) |

## **Table S10. Participant decision making difficulty and time taken (n=987)**

## **Table S11. Reasons for declining genomic newborn screening (n=10)**

| **Reason** | **5 - Strongly influenced (%)** | **4 (%)** | **3 - Somewhat influenced (%)** | **2 (%)** | **1 - Did not influence (%)** | **Not applicable (%)** |
| --- | --- | --- | --- | --- | --- | --- |
| I may be interested in the future, but not at this time | 0 | 0 | 3 (30%) | 2 (20%) | 3 (30%) | 2 (20%) |
| I do not think my baby’s results will be of any value to me | 1 (10%) | 3 (30%) | 1 (1%) | 2 (20%) | 1 (10%) | 2 (20%) |
| I do not think genomic newborn screening is relevant for my baby because I don't have a family history and/or my partner doesn't have a family history of any genetic conditions | 0 | 2 (20%) | 0 | 3 (30%) | 2 (20%) | 3 (30%) |
| **I would prefer to address any health problems my baby has as they arise** | **3 (30%)** | **2 (20%)** | 2 (20%) | 0 | 2 (20%) | 1 (10%) |
| **I am concerned the results may have a negative impact on me (e.g., increased worry)** | **6 (60%)** | **2 (20%)** | 0 | 1 (10%) | 0 | 1 (10%) |
| **I am concerned the results may have a negative impact on my baby (e.g., more medical tests, difficulty obtaining life insurance)** | **5 (50%)** | **1 (10%)** | 2 (20%) | 1 (10%) | 0 | 1 (10%) |
| I am concerned about data privacy and security | 2 (20%) | 1 (10%) | 1 (10%) | 1 (10%) | 4 (40%) | 1 (10%) |
| I have been advised by family/friends to decline | 0 | 0 | 0 | 2 (20%) | 6 (60%) | 2 (20%) |
| My partner was not/would not be interested in genomic newborn screening for our baby | 1 (10%) | 1 (10%) | 2 (20%) | 1 (10%) | 4 (40%) | 1 (10%) |
| I do not want to participate in a research project | 1 (10%) | 0 | 1 (10%) | 1 (10%) | 5 (50%) | 2 (20%) |
| I do not have time to take part in a research project | 1 (10%) | 0 | 0 | 2 (20%) | 5 (50%) | 2 (20%) |

*Table notes*

The most common reasons provided by participants for declining genomic newborn screening are indicated in **bold**.

## **Table S12. Participant attitudes relating to genomic newborn screening (n=372)**

| **Question** | **Yes (%)** | **Unsure (%)** | **No (%)** | **Not applicable**  **(%)** |
| --- | --- | --- | --- | --- |
| Would you choose to have genomic newborn screening for a future baby? | 299 (80%) | 7 (2%) | 1 (<0.5%) | 65 (17%) |
| Would you recommend genomic newborn screening to family and friends? | 344 (92%) | 25 (7%) | 3 (1%) | 0 |
| Do you think genomic newborn screening should be available to all parents? | 370 (99%) | 1 (<0.5%) | 1 (<0.5%) | 0 |
| Do you think genomic newborn screening should be available free of charge? | 362 (97%) | 0 | 10 (3%) | 0 |

## **Table S13. Comparison of high chance results between genomic newborn screening studies**

| **Study** | **Total results** | **High chance results** | **True high chance results (% of all high chance results)** | **High chance G6PD results**  **(% of all high chance results)** | **High chance result rate** | **True high chance result rate** | **High chance result rate excluding G6PD** | **True high chance result rate excluding G6PD** |
| --- | --- | --- | --- | --- | --- | --- | --- | --- |
| Guardian2 | 3982 | 147 | 120 (82%) | 92 (63%) | 3.7% | 3.0% | 1.4% | 0.7% |
| BabyDetect3 | 3847 | 71 | 70 (99%) | 44 (62%) | 1.8% | 1.8% | 0.7% | 0.7% |
| BabyScreen+ | 1000 | 16 | 16 (100%) | 6 (38%) | 1.6% | 1.6% | 1.0% | 1.0% |

# **REFERENCES**

1. Tudini, E. et al. Shariant platform: Enabling evidence sharing across Australian clinical genetic-testing laboratories to support variant interpretation. Am J Hum Genet 109, 1960–1973 (2022).
2. Ziegler, A. & Chung, W. K. Universal newborn screening using genome sequencing: early experience from the GUARDIAN study. Pediatr. Res. 1–5 (2024) doi:10.1038/s41390-024-03647-w.
3. Boemer, F. et al. Population-based, first-tier genomic newborn screening in the maternity ward. Nat. Med. 1–12 (2025) doi:10.1038/s41591-024-03465-x.
